# Supplementary material
Source: HighWire-hosted journal article supplement (https://bmjopen.bmj.com/content/14/2/e081290)
Supplement: inline-supplementary-material-2 [file inline-supplementary-material-2.pdf]

Supplementary File 2: Statistical parameters of distributions of aneurysmal cases reported from 1761-1938,<sup>14</sup> and recorded in RAH from 2011 to 2019.

|                                                |         |                                                                                   |                                                                                                  |                         |                                        |                          |                      |                                     |                        |                                             |
|------------------------------------------------|---------|-----------------------------------------------------------------------------------|--------------------------------------------------------------------------------------------------|-------------------------|----------------------------------------|--------------------------|----------------------|-------------------------------------|------------------------|---------------------------------------------|
|                                                |         | 102 patients with cerebral aneurysmal aneurysms recorded in RAH from 2011 to 2019 | 1127 patients with cerebral aneurysms recorded in 407 publications - published from 1761 to 1938 |                         |                                        |                          |                      |                                     |                        |                                             |
| Statistics - all cases with cerebral aneurysms |         | age>18, 2011 to 2019                                                              | age>18 years, 1761 to 1938                                                                       | age >= 18 & year < 1850 | age >= 18 & year >= 1850 & year < 1900 | age >= 18 & year >= 1900 | all age, year < 1850 | all age, year < 1900 & year >= 1850 | all ages, year >= 1900 | all age group, all years, >400 publications |
| Age in years                                   |         |                                                                                   |                                                                                                  |                         |                                        |                          |                      |                                     |                        |                                             |
| N                                              | Valid   | 102                                                                               | 851                                                                                              | 41                      | 252                                    | 560                      | 42                   | 278                                 | 613                    | 935                                         |
|                                                | Missing | 0                                                                                 | 0                                                                                                | 0                       | 0                                      | 0                        | 7                    | 14                                  | 171                    | 192                                         |
| Mean age                                       |         | 57.6                                                                              | 44.7                                                                                             | 44.3                    | 45.6                                   | 44.3                     | 43.6                 | 42.6                                | 41.2                   | 41.7                                        |
| Median age                                     |         | 60.0                                                                              | 43.0                                                                                             | 47.0                    | 45.0                                   | 42.0                     | 46.0                 | 43.0                                | 41.0                   | 41.0                                        |
| Mode age                                       |         | 48.0                                                                              | 41.0                                                                                             | 20.0                    | 40.0                                   | 41.0                     | 20.0                 | 40.0                                | 41.0                   | 41.0                                        |
| Std. Deviation                                 |         | 13.1                                                                              | 15.5                                                                                             | 15.6                    | 15.6                                   | 15.4                     | 16.1                 | 17.5                                | 17.9                   | 17.7                                        |
| Minimum age                                    |         | 18.0                                                                              | 18.0                                                                                             | 19.0                    | 18.0                                   | 18.0                     | 14.0                 | 6.0                                 | 1.5                    | 1.5                                         |
| Maximum age                                    |         | 83.0                                                                              | 89.0                                                                                             | 68.0                    | 86.0                                   | 89.0                     | 68.0                 | 86.0                                | 89.0                   | 89.0                                        |
| Percentiles                                    | 25      | 48.0                                                                              | 32.0                                                                                             | 33.5                    | 33.3                                   | 32.0                     | 31.8                 | 28.8                                | 29.0                   | 29.0                                        |
|                                                | 50      | 60.0                                                                              | 43.0                                                                                             | 47.0                    | 45.0                                   | 42.0                     | 46.0                 | 43.0                                | 41.0                   | 41.0                                        |
|                                                | 75      | 68.3                                                                              | 56.0                                                                                             | 59.0                    | 56.0                                   | 55.0                     | 59.0                 | 56.0                                | 53.0                   | 54.0                                        |

Legend: 14 = McDonald, CA & Korb, M 1939, Intracranial aneurysms, Archives of neurology and psychiatry (Chicago), vol. 42, no. 2, pp. 298-328.
